# Supplementary material for: Photocatalytic Degradation of Tetracycline by ZnO/γ-Fe2O3 Paramagnetic Nanocomposite Material
Source: MDPI journal article supplement (doi:10.3390/nano10081458), 2020-07-25
Supplement: s1 [file s1]

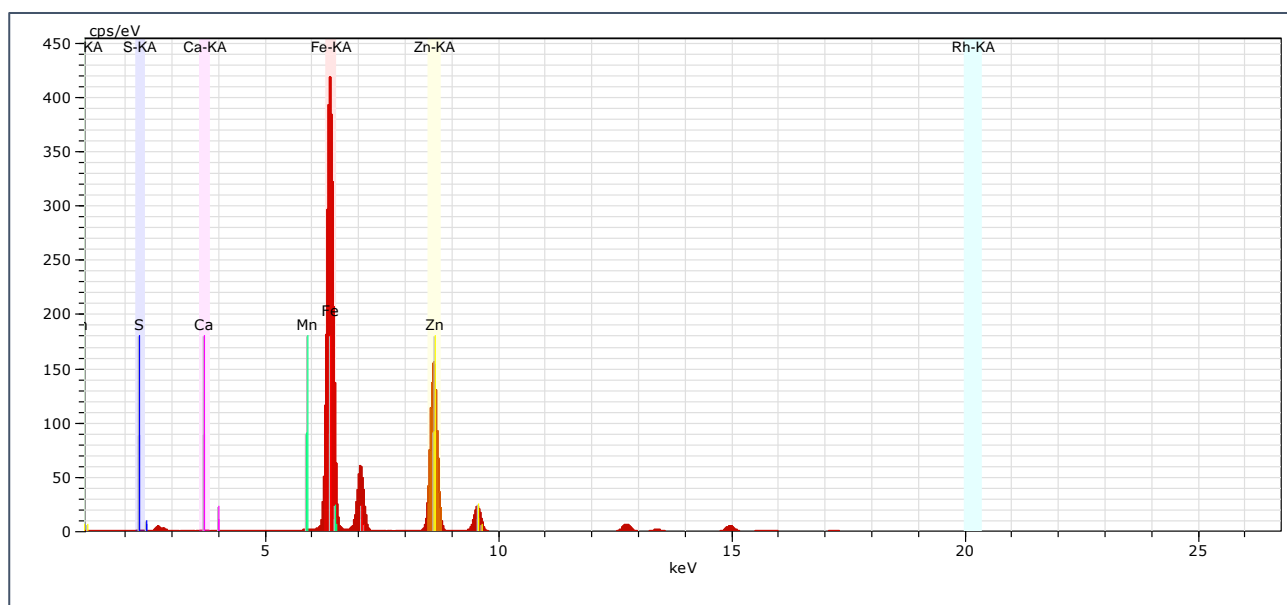

**Figure S1.** XRF spectra of the ZnO-IO composite photocatalyst. The elements present in the composite material are shown in the spectra according to their individual peaks.

**Table S1.** Calculated wt% of the oxides present in the composite photocatalyst.

| Compounds                      | Amount (wt%) |
|--------------------------------|--------------|
| Fe <sub>2</sub> O <sub>3</sub> | 59.32        |
| ZnO                            | 40.07        |
| MnO                            | 0.17         |
| CaO                            | 0.04         |
| SO <sub>3</sub>                | 0.40         |
